# Supplementary material
Source: Springer Nature journal article supplement (https://www.springermedizin.de/resource/supplementary/12876_2001_17_MOESM8_ESM.pdf/9438562)

**(a)**

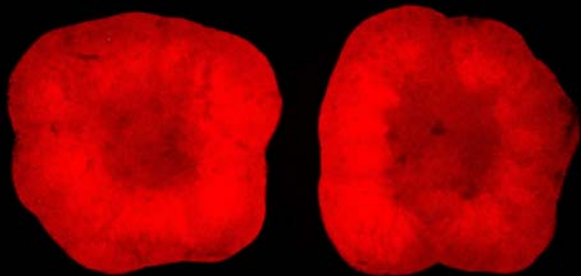

**(b)**

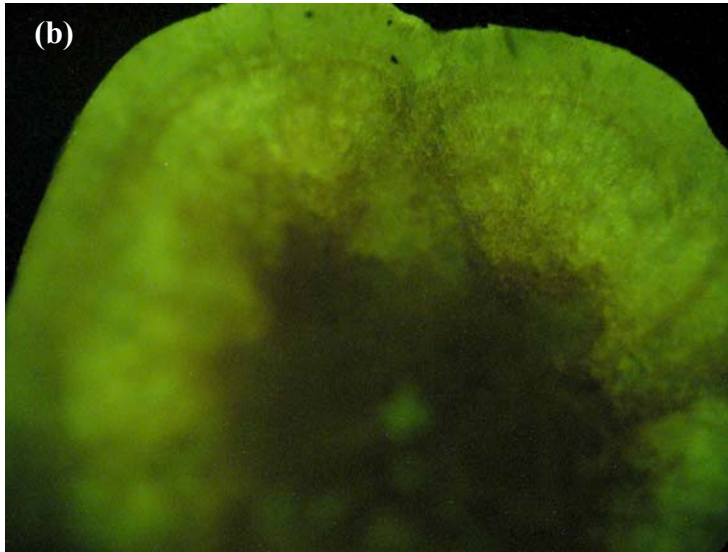

**(c)**

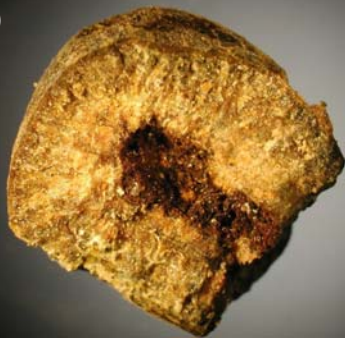

**(d)**

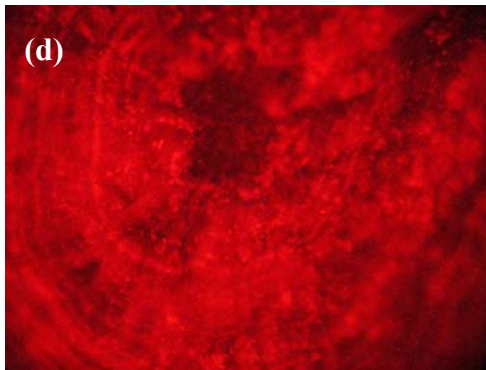

**(e)**

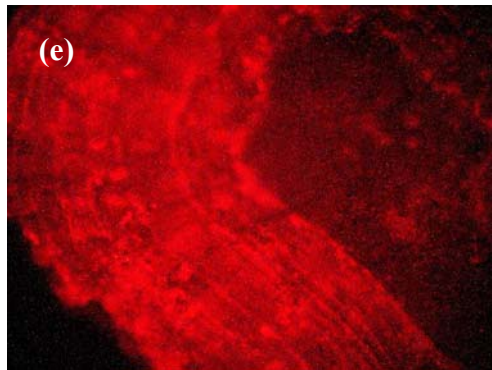

Supplement: MOESM8 [file 9438562]
